# Supplementary material for: MicroRNAs Signature Panel Identifies Heavy Drinkers with Alcohol-Associated Cirrhosis from Heavy Drinkers without Liver Injury
Source: MDPI journal article supplement (doi:10.3390/biology12101314), 2023-10-08
Supplement: s1 [file s1]

# Supplementary Materials: MicroRNAs Signature Panel Identifies Heavy Drinkers with Alcohol-Associated Cirrhosis from Heavy Drinkers without Liver Injury

Fathima Shihana, Mugdha V. Joglekar, Tae-Hwi Schwantes-An, Anandwardhan A. Hardikar and Devanshi Seth

Table S1: List of microRNAs resulting from different analyses

| Cases vs drinking controls | Correlation analysis of 21 miRNA expression (rCt) with traditional biomarkers | miRNAs by best performance AUC-ROC | AH vs Cirrhosis  |
|----------------------------|-------------------------------------------------------------------------------|------------------------------------|------------------|
| miR-16                     | miR-16                                                                        | miR-191                            | miR-15a          |
| miR-19a                    | miR-19a                                                                       | miR-27a                            | <b>miR-21-5p</b> |
| miR-19b                    | miR-27a                                                                       | miR-130a                           | <b>miR-28</b>    |
| miR-26a                    | miR-29b                                                                       |                                    | miR-125b-5p      |
| miR-27a                    | miR-101                                                                       |                                    | and miR-185      |
| miR-27b                    | miR-130a                                                                      |                                    |                  |
| miR-29b                    | miR-191                                                                       |                                    |                  |
| miR-30c                    |                                                                               |                                    |                  |
| miR-101                    |                                                                               |                                    |                  |
| miR-130a                   |                                                                               |                                    |                  |
| miR-151-3p                 |                                                                               |                                    |                  |
| miR-152                    |                                                                               |                                    |                  |
| miR-191                    |                                                                               |                                    |                  |
| miR-199a-3p                |                                                                               |                                    |                  |
| miR-221                    |                                                                               |                                    |                  |

miR-301  
miR-335  
miR-379  
miR-374-5p  
miR-652  
miR-532-3p

Upregulated microRNAs are in bold. Controls are drinking controls with no liver disease; Cases are drinkers with cirrhosis and alcoholic hepatitis; Cirrhosis are drinkers with cirrhosis (no AH); AH are drinkers with alcoholic hepatitis.

**Table S2: Correlation analysis of miRNA expression ( $\Delta$ Ct Ct) with traditional biomarkers.**

| miRs        | Albumin(umol/l)         | Platelet count (10 <sup>9</sup> /L) | GGT(IU/L)             | BMI                  | Haemoglobin (g/L)        |
|-------------|-------------------------|-------------------------------------|-----------------------|----------------------|--------------------------|
| miR-16      | -0.31* (-0.55 to -0.01) | -0.38* (-0.59 to 0.02)              | -0.01 (-0.29 to 0.29) | 0.19 (-0.11 to 0.45) | -0.24 (-0.50 to 0.05)    |
| miR-19a     | -0.31* (-0.55 to -0.01) | -0.34* (-0.58 to -0.05)             | 0.19 (-0.10 to 0.46)  | 0.22 (-0.07 to 0.49) | -0.17 (-0.44 to 0.12)    |
| miR-19b     | -0.16 (-0.43 to 0.14)   | -0.29* (-0.54 to 0.01)              | 0.12 (-0.17 to 0.40)  | 0.14 (-0.16 to 0.41) | -0.24 (-0.49 to 0.06)    |
| miR-26a     | -0.16 (-0.43 to 0.13)   | -0.40** (-0.62 to -0.12)            | 0.34* (0.05 to 0.58)  | 0.24 (-0.05 to 0.50) | -0.25 (-0.51 to 0.04)    |
| miR-27a     | -0.05 (-0.33 to 0.24)   | -0.30* (-0.54 to -0.01)             | 0.22 (-0.07 to 0.48)  | 0.34* (0.05 to 0.57) | -0.13 (-0.41 to 0.16)    |
| miR-27b     | -0.25 (-0.51 to 0.04)   | -0.24 (-0.50 to 0.05)               | 0.11 (-0.18 to 0.40)  | 0.06 (-0.23 to 0.34) | -0.18 (-0.45 to 0.12)    |
| miR-29c     | -0.29* (-0.54 to -0.01) | -0.25 (-0.51 to 0.04)               | 0.31 (0.02 to 0.55)   | 0.28 (0.01 to 0.53)  | -0.28 (-0.53 to 0.01)    |
| miR-30c     | -0.22 (-0.48 to 0.07)   | -0.41** (-0.63 to -0.13)            | 0.05 (-0.23 to 0.34)  | 0.26 (-0.03 to 0.52) | -0.32* (-0.56 to -0.02)  |
| miR-101     | -0.20 (-0.46 to 0.09)   | -0.29* (-0.53 to 0.02)              | 0.33* (0.04 to 0.57)  | 0.26 (-0.03 to 0.52) | -0.19 (-0.46 to 0.10)    |
| miR-130a    | -0.30* (-0.55 to -0.01) | -0.40** (-0.62 to -0.11)            | 0.26 (-0.03 to 0.52)  | 0.22 (-0.07 to 0.48) | -0.40** (-0.62 to -0.11) |
| miR-151-3p  | -0.19 (-0.46 to 0.10)   | -0.35* (-0.58 to -0.06)             | -0.01 (-0.30 to 0.28) | 0.31* (0.02 to 0.55) | -0.25 (-0.51 to 0.04)    |
| miR-191     | -0.30* (-0.55 to -0.01) | -0.44** (-0.65 to -0.17)            | 0.17 (-0.13 to 0.44)  | 0.30* (0.01 to 0.55) | -0.10 (-0.38 to 0.20)    |
| miR-199a-3p | -0.06 (-0.35 to 0.23)   | -0.31* (-0.55 to -0.01)             | 0.12 (-0.17 to 0.40)  | 0.25 (-0.04 to 0.51) | -0.23 (-0.54 to 0.13)    |
| miR-221     | -0.21 (-0.47 to 0.08)   | -0.34* (-0.57 to -0.05)             | 0.34* (0.05 to 0.57)  | 0.20 (-0.09 to 0.46) | -0.24 (-0.50 to 0.05)    |

|            |                       |                         |                      |                      |                         |
|------------|-----------------------|-------------------------|----------------------|----------------------|-------------------------|
| miR-335    | -0.16 (-0.43 to 0.14) | -0.36* (-0.59 to -0.07) | 0.31* (0.02 to 0.55) | 0.32* (0.02 to 0.56) | -0.31* (-0.55 to -0.02) |
| miR-374-5p | -0.22 (-0.48 to 0.07) | -0.20 (-0.46 to 0.10)   | 0.27 (-0.02 to 0.52) | 0.20 (-0.09 to 0.47) | -0.27 (-0.52 to 0.02)   |
| miR-532-3p | -0.16 (-0.44 to 0.13) | -0.24 (-0.49 to 0.05)   | 0.07 (-0.22 to 0.35) | 0.18 (-0.11 to 0.45) | -0.17 (-0.44 to 0.13)   |
| miR-652    | -0.28 (-0.53 to 0.01) | -0.36* (-0.59 to -0.07) | 0.20 (-0.10 to 0.46) | 0.18 (-0.11 to 0.45) | -0.14 (-0.42 to 0.15)   |

**Table S3: Correlation of miRNA expression with genetic risk variants for alcohol-associated cirrhosis**

|             | <i>PNPLA3</i><br>rs2294915 | <i>TM6SF2</i><br>rs10401969 | <i>HSD17B13</i><br>rs10433937 | <i>FAF2</i><br>rs11134977 | <i>SERPINA1</i><br>rs28929474 | <i>MARC1</i><br>rs2642438 | <i>MBOAT7</i><br>rs641738 |
|-------------|----------------------------|-----------------------------|-------------------------------|---------------------------|-------------------------------|---------------------------|---------------------------|
| miR-16      | 0.06                       | 0.04                        | 0.25                          | 0.13                      | -0.03                         | -0.06                     | -0.3                      |
| miR-19a     | 0.05                       | 0.04                        | <b>0.51***</b>                | -0.04                     | -0.09                         | -0.08                     | 0                         |
| miR-19b     | 0.11                       | 0.03                        | 0.22                          | 0.12                      | 0                             | -0.03                     | -0.04                     |
| miR-26a     | -0.13                      | 0.26                        | <b>0.32*</b>                  | -0.01                     | 0.05                          | -0.11                     | 0                         |
| miR-27a     | -0.03                      | 0.19                        | 0.2                           | 0.3                       | -0.04                         | -0.19                     | 0.11                      |
| miR-27b     | 0.25                       | <b>0.33*</b>                | 0.17                          | -0.01                     | 0                             | -0.2                      | -0.04                     |
| miR-29c     | 0.01                       | 0.23                        | 0.06                          | 0.29                      | 0.05                          | 0.01                      | 0.22                      |
| miR-30c     | 0.09                       | 0.21                        | 0.19                          | 0.13                      | 0.12                          | -0.02                     | -0.13                     |
| miR-101     | 0.09                       | 0.28                        | <b>0.32*</b>                  | 0.14                      | 0.11                          | 0.08                      | -0.1                      |
| miR-130a    | 0.04                       | 0.2                         | 0.22                          | <b>0.34*</b>              | 0.22                          | 0.02                      | 0.19                      |
| miR-151-3p  | -0.04                      | 0.17                        | <b>0.38*</b>                  | 0.18                      | 0.15                          | 0.03                      | -0.02                     |
| miR-152     | 0.2                        | -0.17                       | 0.3                           | 0.1                       | 0.14                          | 0.2                       | -0.05                     |
| miR-191     | 0.11                       | 0.13                        | 0.3                           | 0.13                      | 0.23                          | 0.04                      | -0.09                     |
| miR-199a-3p | 0.05                       | 0.19                        | 0.3                           | -0.03                     | 0.07                          | -0.28                     | 0.19                      |
| miR-221     | 0.08                       | 0.2                         | <b>0.32*</b>                  | 0.1                       | 0.08                          | -0.21                     | 0.19                      |
| miR-301     | -0.12                      | 0.19                        | <b>0.45**</b>                 | 0.1                       | 0.14                          | -0.07                     | -0.29                     |
| miR-335     | 0.31                       | -0.08                       | 0.28                          | -0.15                     | 0.09                          | <b>-0.35*</b>             | 0.03                      |

|            |       |       |      |      |      |       |       |
|------------|-------|-------|------|------|------|-------|-------|
| miR-374-5p | -0.26 | 0.23  | 0.07 | 0.23 | 0.09 | 0.27  | 0.17  |
| miR-379    | 0.09  | 0.17  | 0.16 | 0.13 | 0.07 | -0.22 | 0.11  |
| miR-410    | -0.2  | 0     | 0.08 | 0.26 | 0.07 | -0.14 | -0.03 |
| miR-532-3p | 0.1   | 0.28  | 0.18 | 0.21 | 0.11 | -0.07 | -0.08 |
| miR-652    | 0.08  | -0.01 | 0.02 | 0.04 | 0.09 | -0.19 | 0.15  |

Significant correlation coefficients are bold

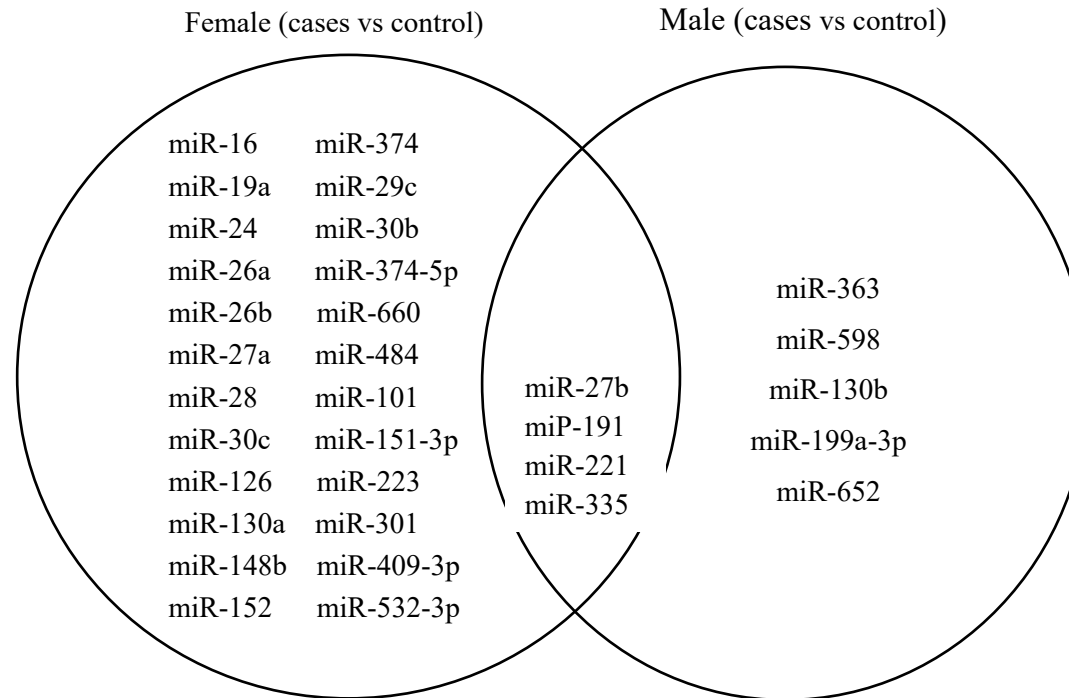

**Figure S1: Differentially expressed microRNAs in male and female cases compared to drinking controls.** Venn diagram shows significantly downregulated microRNAs in cases versus drinking controls by female/male gender. Four microRNAs are commonly downregulated in both female and male cases.

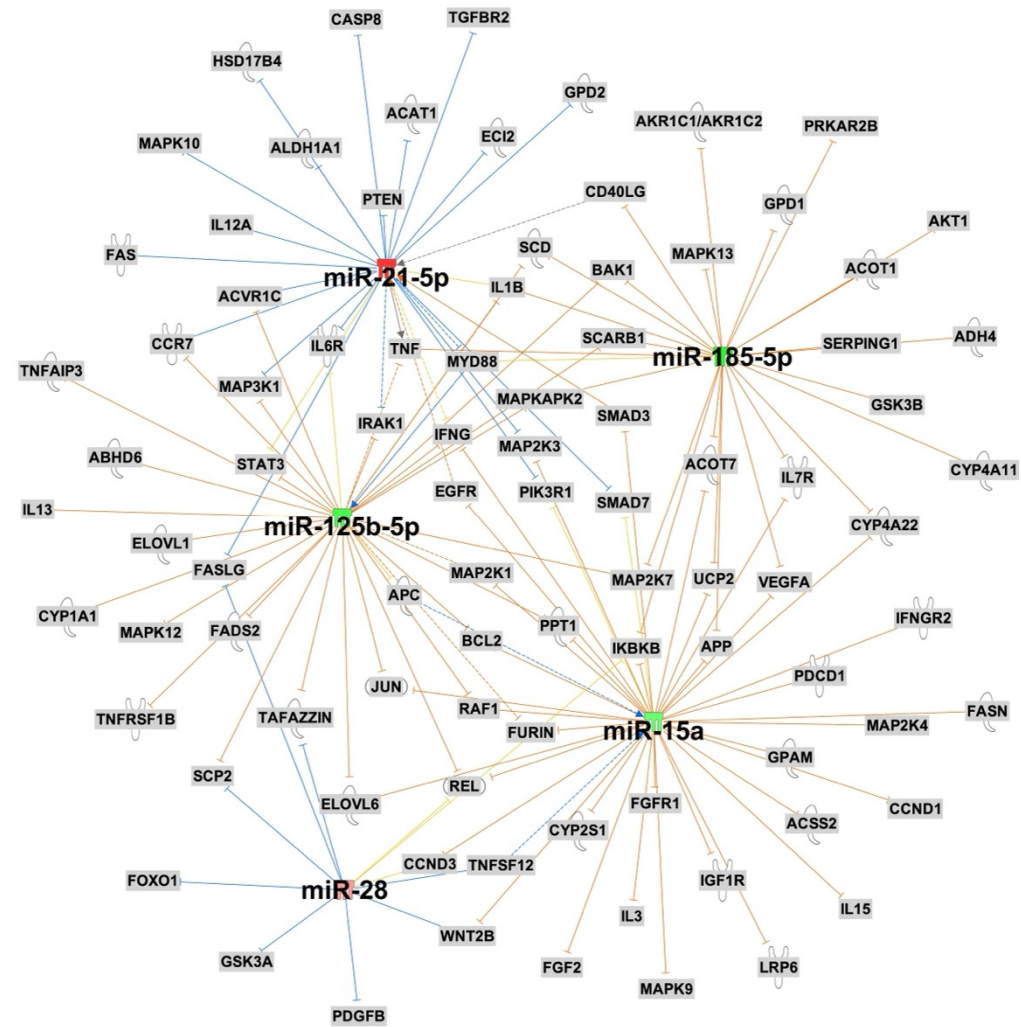

a)

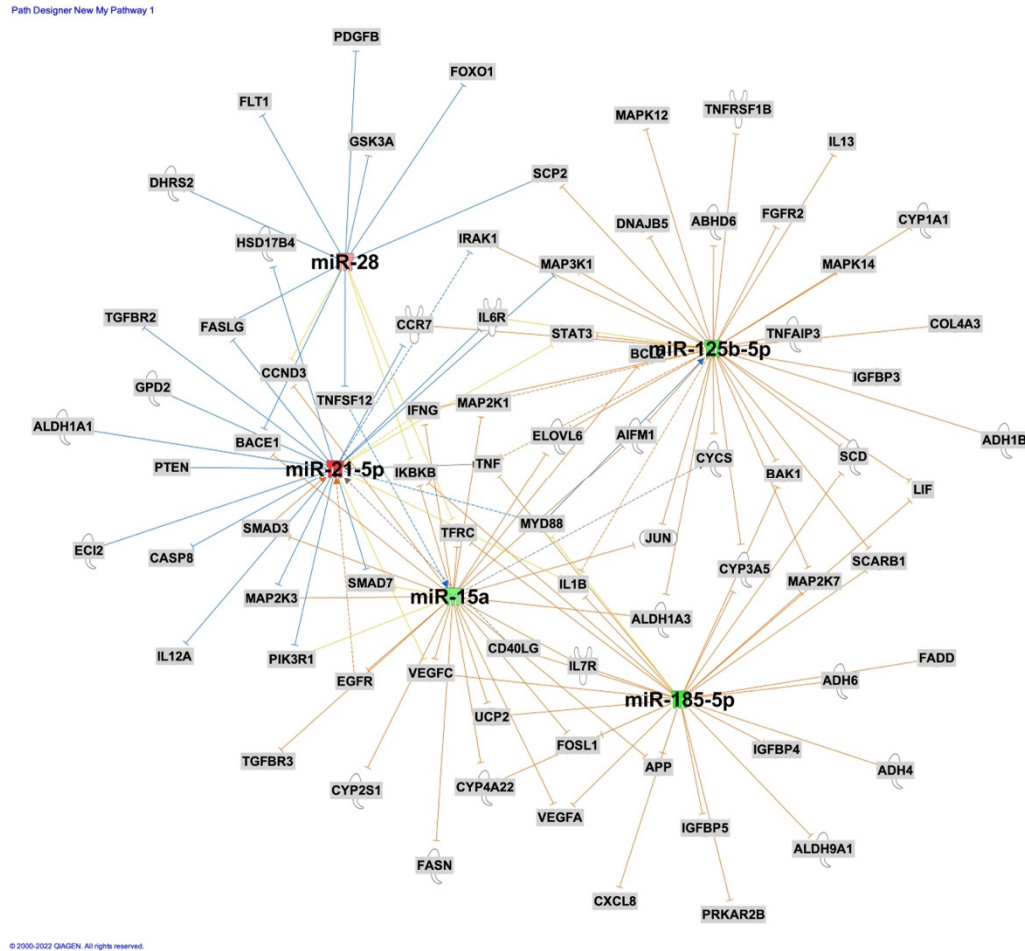

b)

**Figure S2:** Target mRNA and microRNA-mRNA interactions derived from select AH specific microRNAs. Target mRNAs of 5 microRNAs associated with AH were overlaid on **a)** disease and functions, and **b)** Toxic functions using 'Pathway design' option in IPA. The top interaction networks are presented.
